# Supplementary material for: Ancient origin of the divergent forms of leucyl-tRNA synthetases in the Halobacteriales
Source: PubMed Central journal article supplement (PMC3436685; doi:10.1186/1471-2148-12-85), 2012-06-13

0.5

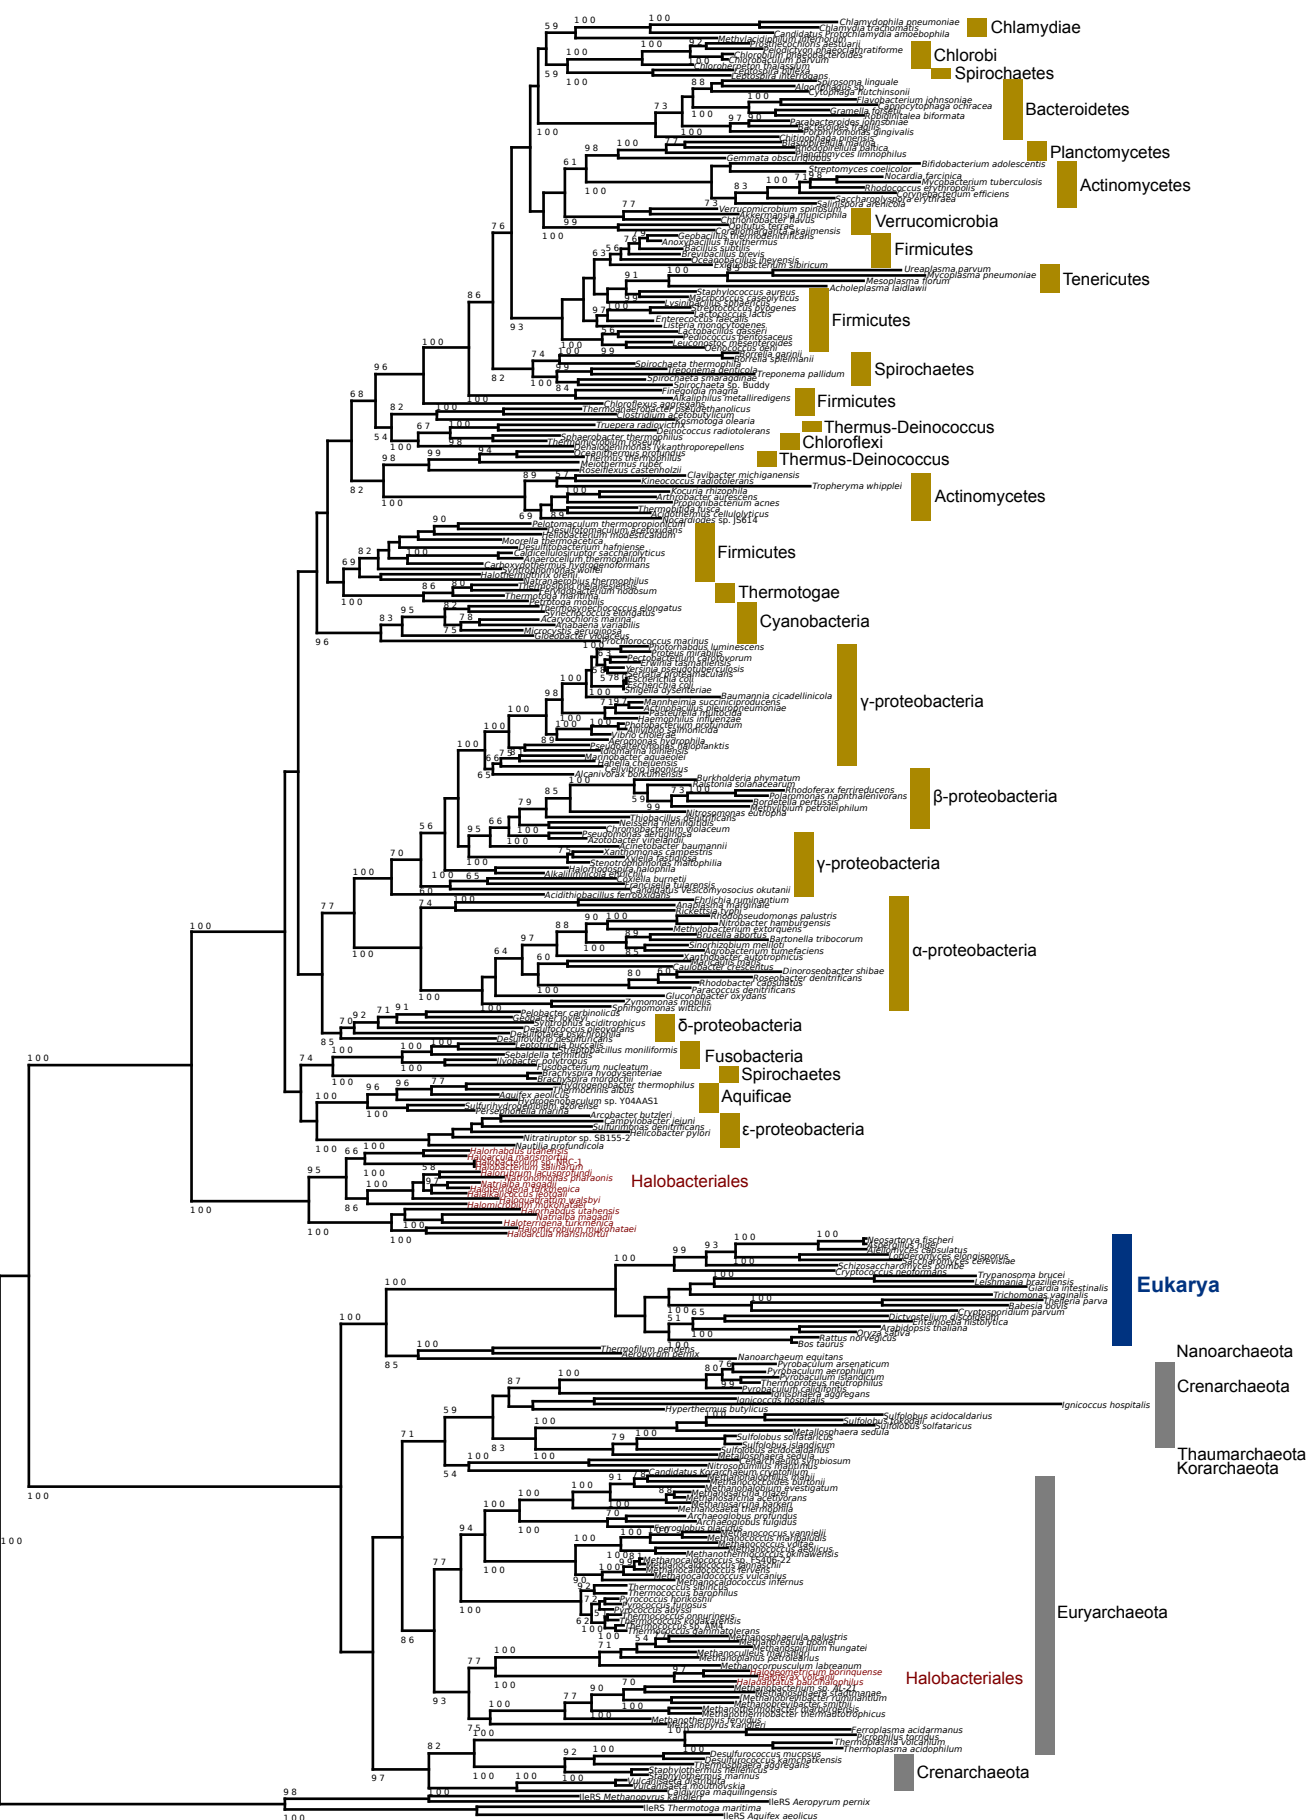

Supplement: 1471-2148-12-85-S2.pdf [file 1471-2148-12-85-S2.pdf]
